# Supplementary material for: Highly efficient full-color and white circularly polarized luminescent nanoassemblies and their performance in light emitting devices
Source: Royal Society of Chemistry journal article supplement (doi:10.1039/d0nr00279h), 2020-01-01
Supplement: d0nr00279h1.pdf [file d0nr00279h1.pdf]

## Electronic Supplementary Information (ESI)

### Highly Efficient Full-Color and White Circularly Polarized Luminescent Nanoassemblies and Their Performance in Light Emitting Devices

Li Yang, Juexin Huang, Mingguo Qin, Xiaoyu Ma, Xiaoqiu Dou, Chuan-Liang Feng\*

State key Lab of Metal Matrix Composites, School of Materials Science and Engineering, Shanghai Jiao Tong University, Dongchuan Road 800, 200240, Shanghai, China.

E-mail: clfeng@sjtu.edu.cn

#### 1. Supplementary Figures

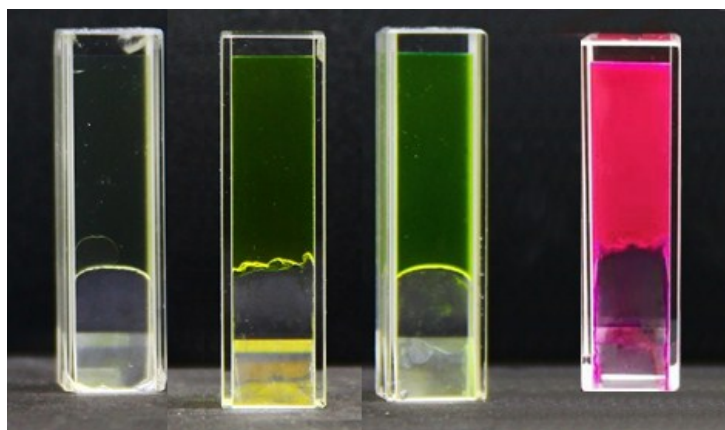

**Figure S1.** Photographs of the cogels of LPF-Py, LPF-2An, LPF-1An, and LPF-RB under ambient light. The solvent is acetonitrile. [LPF-Py] = 6 mg/mL, [LPF-2An] = 6 mg/mL, [LPF-1An] = 6 mg/mL, and [LPF-RB] = 12 mg/mL.

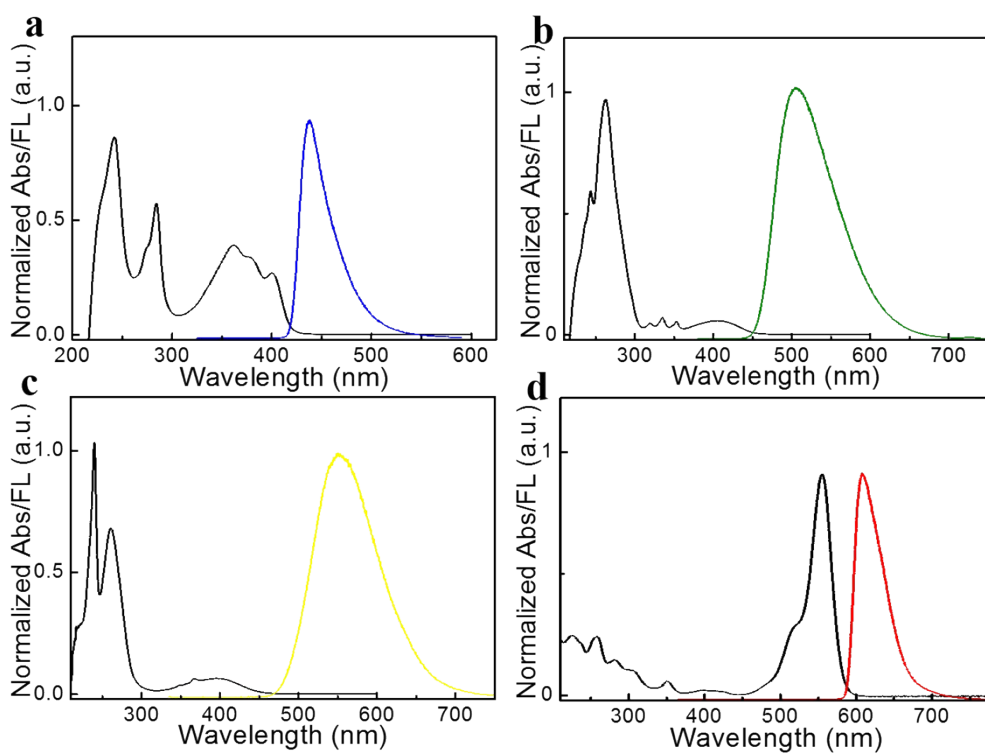

**Figure S2.** The normalized absorption and fluorescence spectra of the solution of Py (a), 2An (b), 1An (c), and RB (d), the solvent is acetonitrile.

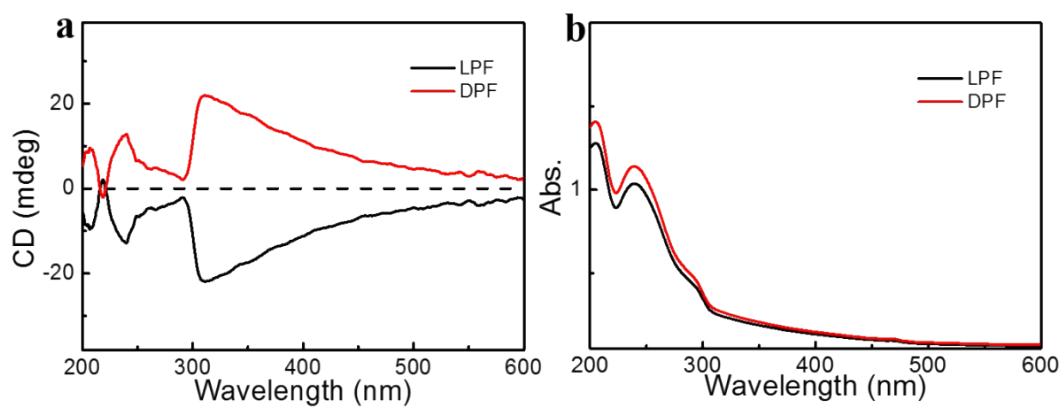

**Figure S3.** CD and UV-Vis spectra of LPF and DPF gels. The solvent is acetonitrile. [LPF/DPF] = 5 mg/mL.

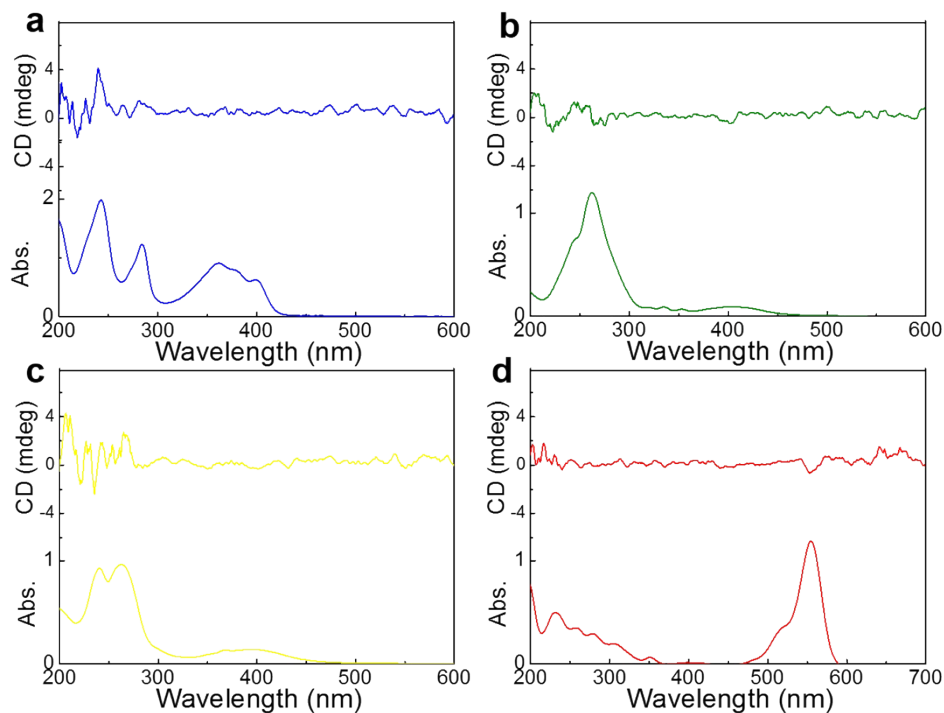

**Figure S4.** CD and UV/Vis spectra of fluorescent aromatic molecules with different colors of Py(a), 2An (b), 1An (c), and RB (d). The solution of these fluorescent aromatic molecules were CD-silent due to their achiral nature, the solvent is acetonitrile.

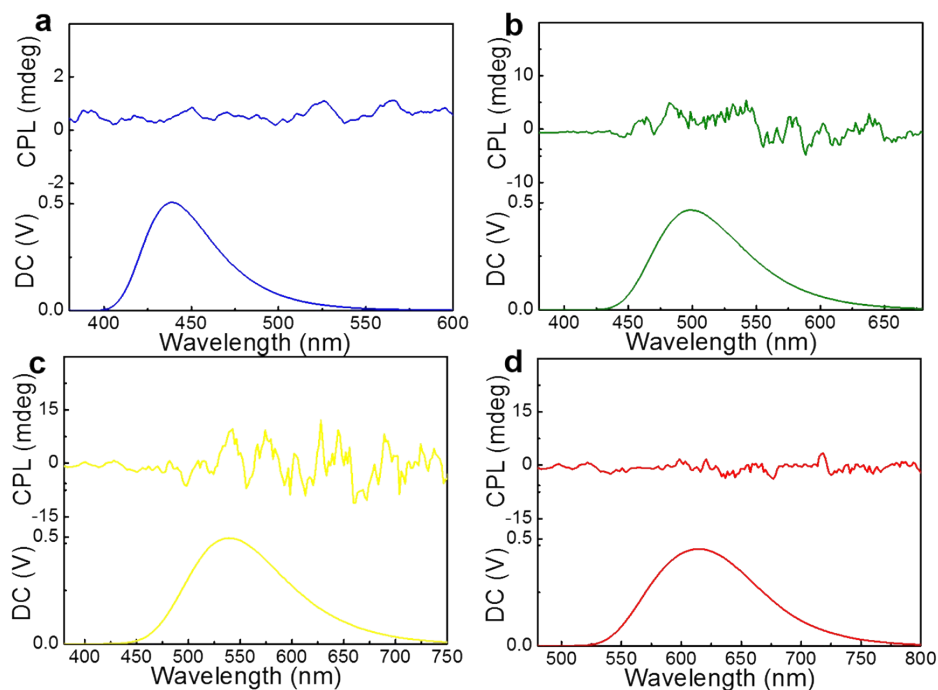

**Figure S5.** CPL spectra of Py (a), 2An (b), 1An (c), and RB (d). The solution of these fluorescent aromatic molecules were CPL-silent due to their achiral nature, the solvent is acetonitrile.

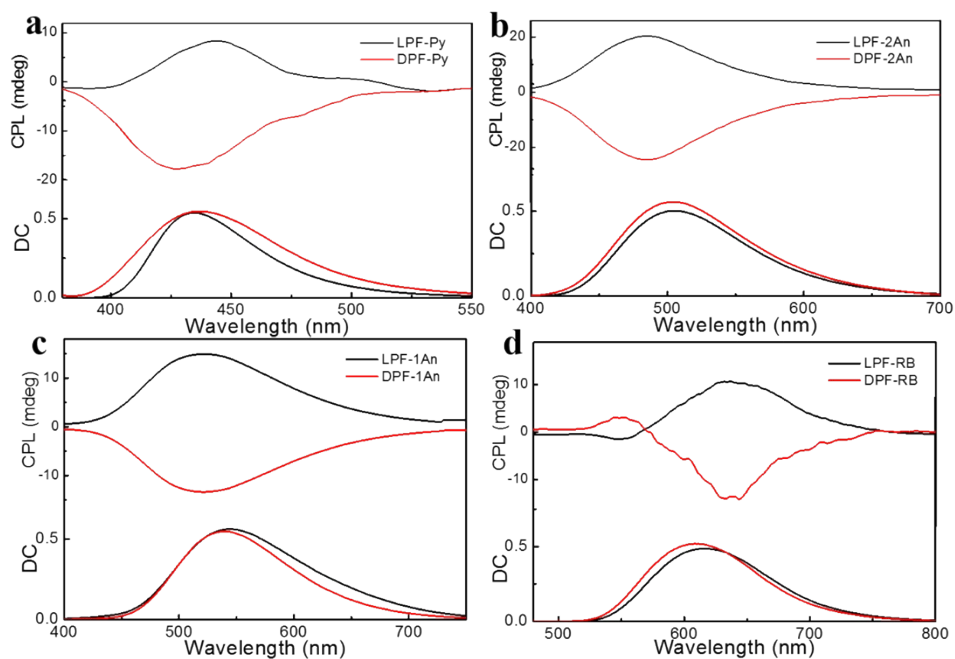

**Figure S6.** CPL and fluorescence spectra of the cogels composed of LPF/DPF-Py(a), LPF/DPF-2An(b), LPF/DPF-1An(c), and LPF/DPF-RB(d), respectively.

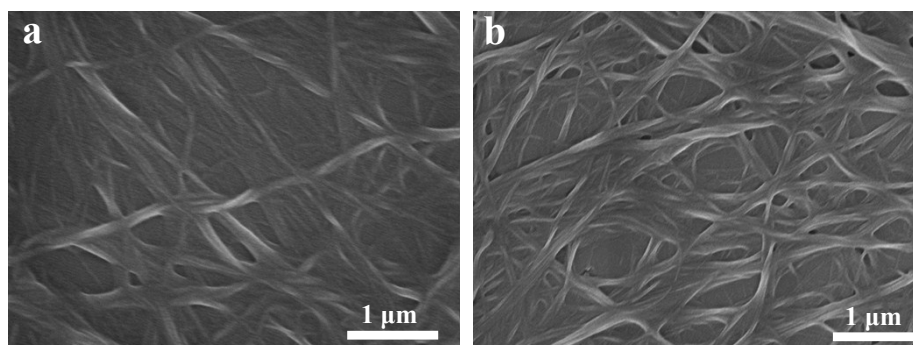

**Figure S7.** SEM images of assemblies of LPF and DPF.

**Table S1.** Optical properties of various color cogels.

|     | Solution                |                  |                       | Cogels                  |                  |                       |                                             |                  |                       |                                             |
|-----|-------------------------|------------------|-----------------------|-------------------------|------------------|-----------------------|---------------------------------------------|------------------|-----------------------|---------------------------------------------|
|     | $\lambda_{em}^a)$<br>nm | $\Phi_F^b)$<br>% | $\tau_{avg}^c)$<br>ns | $\lambda_{em}^a)$<br>nm | $\Phi_F^b)$<br>% | $\tau_{avg}^c)$<br>ns | $g_{lum}^d)$<br>(+)<br>( $\times 10^{-3}$ ) | $\Phi_F^b)$<br>% | $\tau_{avg}^c)$<br>ns | $g_{lum}^d)$<br>(-)<br>( $\times 10^{-3}$ ) |
|     |                         |                  |                       | (LPF)                   | (LPF)            | (LPF)                 | ( $\times 10^{-3}$ )                        | (DPF)            | (DPF)                 | ( $\times 10^{-3}$ )                        |
| Py  | 435                     | 69.4             | 35.6                  | 435                     | 48.0             | 26.7                  | 2.85                                        | 45.6             | 23.5                  | -2.95                                       |
| 2An | 500                     | 21.9             | 55.6                  | 500                     | 18.5             | 32.4                  | 4.20                                        | 17.7             | 30.2                  | -3.83                                       |
| 1An | 540                     | 23.2             | 46.8                  | 540                     | 17.3             | 30.2                  | 2.16                                        | 14.1             | 31.4                  | -2.32                                       |
| RB  | 610                     | 16.1             | 68.3                  | 610                     | 10.1             | 19.2                  | 1.20                                        | 11.2             | 24.0                  | -1.4                                        |

a) Absorption maximum in acetonitrile; b) PL measured in acetonitrile; c) Absolute fluorescence quantum yield obtained using the calibrated integrating sphere system; d) Fluorescence lifetime ( $\tau_{avg}$ ) calculated using the equation  $\tau_{avg} = A_1\tau_1 + A_2\tau_2$ .

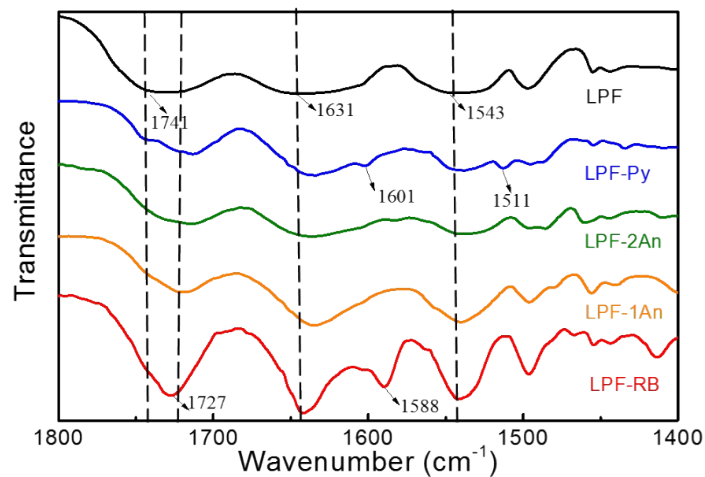

**Figure S8.** FTIR spectra of LPF, LPF-Py, LPF-2An, LPF-1An, and LPF-RB co-gels.

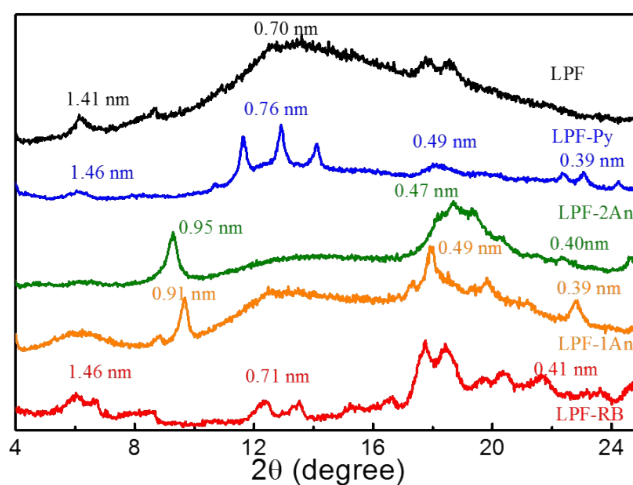

**Figure S9.** XRD plots of the xerogels of LPF, LPF-Py, LPF-2An, LPF-1An, and LPF-RB.

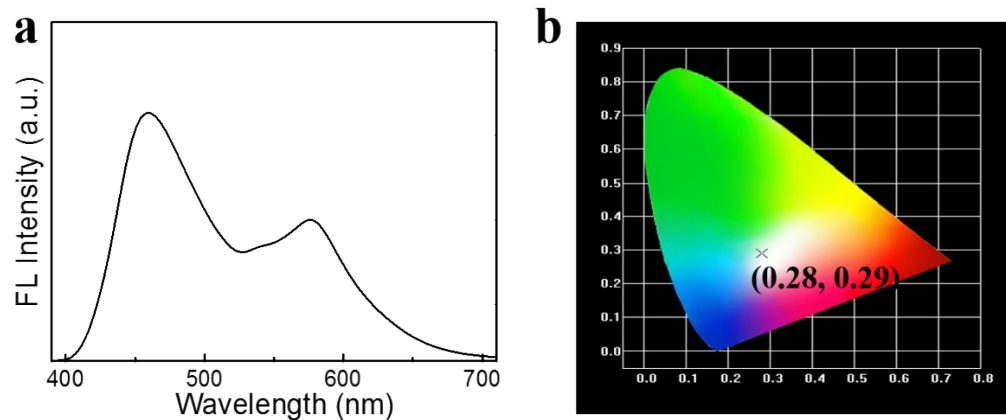

**Figure S10.** Fluorescence spectra of the white-emitting solution (a); Commission Internationale de l'Éclairage coordinate value of the white-emitting solution where the CIE coordinate value is (0.28, 0.29) (b).

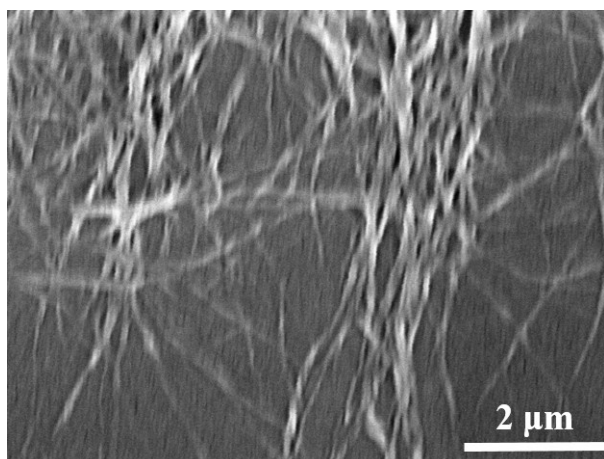

**Figure S11.** SEM image of the white cogels.
